# Supplementary material for: Efficacy of Plant-Made Human Recombinant ACE2 against COVID-19 in a Golden Syrian Hamster Model
Source: MDPI journal article supplement (doi:10.3390/v15040964), 2023-04-14
Supplement: s1 [file s1]

**Supplementary Table S1.** Modified Ashcroft scale (lung fibrosis) of lung tissue lesions among hamster groups at different time points\*.

| Groups               | dpi* | Case no. | Grade of fibrosis <sup>‡</sup> |
|----------------------|------|----------|--------------------------------|
| G1 PBS control       |      | 1        | 0                              |
|                      |      | 2        | 0                              |
|                      |      | 3        | 0                              |
|                      |      | 4        | 0                              |
| G2 virus infection   | 3    | 1        | 1                              |
|                      |      | 2        | 4                              |
|                      | 6    | 1        | 6                              |
|                      |      | 2        | 5                              |
|                      | 9    | 1        | 7                              |
|                      |      |          |                                |
| G3 ACE2 Injection    | 3    | 1        | 2                              |
|                      |      | 2        | 2                              |
|                      |      | 3        | 1                              |
|                      | 6    | 1        | 5                              |
|                      |      | 2        | 5                              |
|                      |      | 3        | 5                              |
|                      | 9    | 1        | 2                              |
|                      |      | 2        | 3                              |
|                      | 3    | 1        | 5                              |
|                      |      | 2        | 6                              |
| G4 ACE2-Fd Injection | 6    | 1        | 6                              |
|                      |      | 2        | 5                              |
|                      | 9    | 1        | 3                              |
|                      |      | 2        | 3                              |
|                      | 3    | 1        | 3                              |
|                      |      | 2        | 3                              |

\*Dpi, days post infection;

<sup>‡</sup> 0, Normal with no fibrosis; 1, isolated thick septum; 2, isolated knot-like formation; 3, contiguous fibrotic walls, no fibrotic mass; 4, single fibrotic mass ( $\leq 10\%$  of microscopic field); 5, confluent fibrotic mass ( $>10\%$  and  $\leq 50\%$  of microscopic field); 6, large contiguous fibrotic mass ( $>50\%$  of microscopic field); 7, alveoli nearly obliterated with honeycombing.
