# Supplementary material for: Efficacy of Plant-Made Human Recombinant ACE2 against COVID-19 in a Golden Syrian Hamster Model
Source: MDPI journal article supplement (doi:10.3390/v15040964), 2023-04-14
Supplement: s1 [file s1]

**A**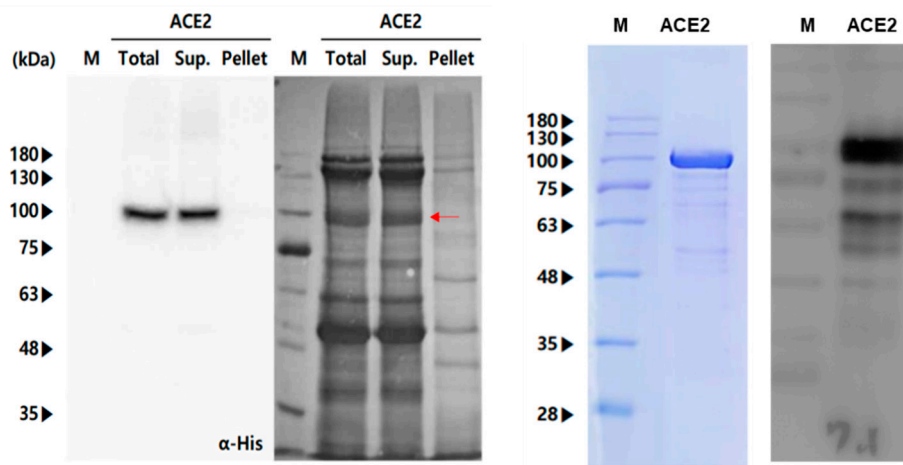**B**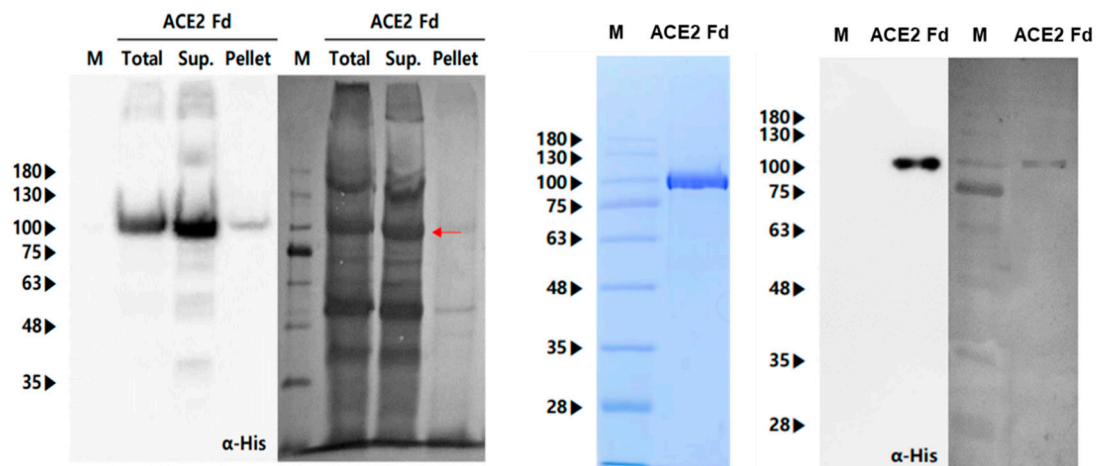

**Supplementary Figure S1.** SDS-PAGE and western blot analysis of purified hrACE2 (A) and hrACE2-Fd (B) recombinant proteins. hrACE2 and hrACE2-Fd expression in the total protein extract and in soluble and insoluble fractions was assessed using western blotting with the anti-His antibody ( $\alpha$ -His). Confirmation of the purified hrACE2 and hrACE2-Fd was done by SDS-PAGE stained with Coomassie blue and western blotting with the anti-His and rabbit anti-ACE2 polyclonal antibodies (Sino Biological, #80031-RP02).
